# Supplementary material for: Long-Lasting Labour Market Consequences of German Unification
Source: publisher site journal article supplement (doi:10.1515/jbnst-2015-1013), 2016-02-18
Supplement: Supplementary file 2 [file jbnst-2015-1013ad.zip]

## **Data issues**

Most of the data is taken from IAB data sets and from data provided by the Federal Employment Agency:

- The SIAB data set of 2010 provided by the Research Data Center (FDZ) of the Federal Employment Agency in the IAB. This is a 2-% sample of the Employment Statistics
- the IAB Establishment Panel
- a special draw of the IAB Employment Statistics
- the Federal Employment Agency Data Warehouse (DWH).

This data are so-called "Sozialdaten" (social data) which are protected against access by German law. However, access to this data is possible via different ways for non-members of the IAB. For the SIAB it is possible by approaching the FDZ, because it is a scientific use file (SUF). Data from the Establishment Panel can be used by visits at the FDZ.

Other data used in this study is taken from the Federal Statistical Office (destatis) and the "Patentatlas Deutschland" (DPMA). This data can be freely obtained from webpages. In the excel file (public\_data.xls) this material is presented.
